# Supplementary material for: Formyl-Peptide Receptor 2 Signaling Modulates SLC7A11/xCT Expression and Activity in Tumor Cells
Source: MDPI journal article supplement (doi:10.3390/antiox13050552), 2024-04-30

# Supplementary Figure S2

WB:  $\alpha$ -xCT/SLC7A11

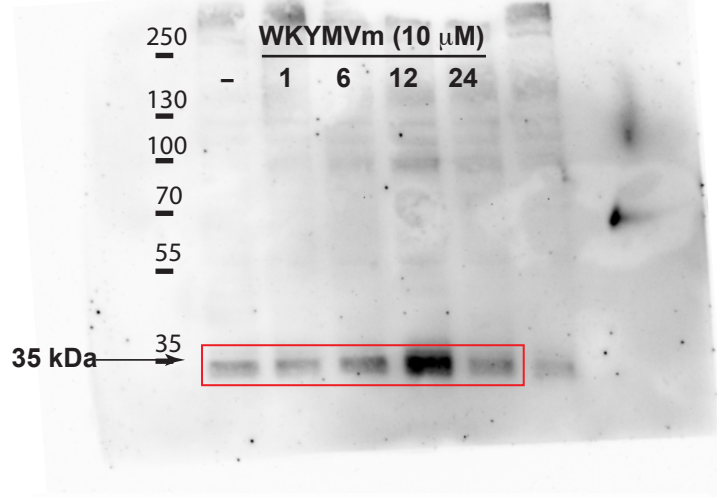

WB:  $\alpha$ -Tubulin

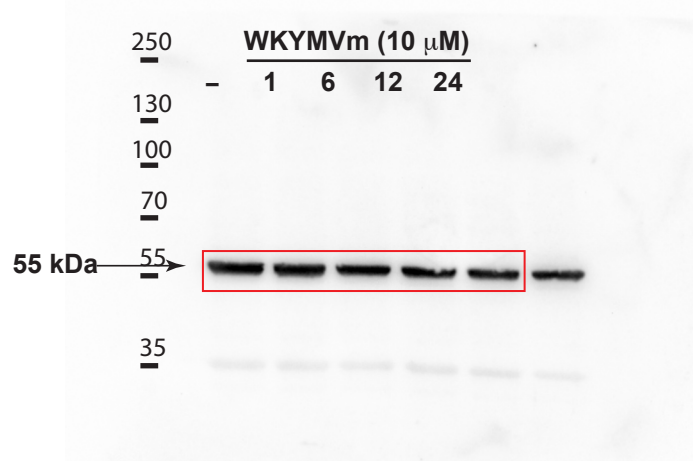

WB:  $\alpha$ -xCT/SLC7A11

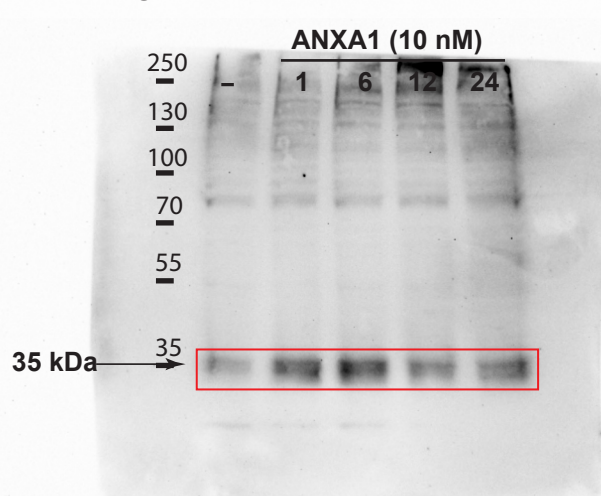

WB:  $\alpha$ -Tubulin

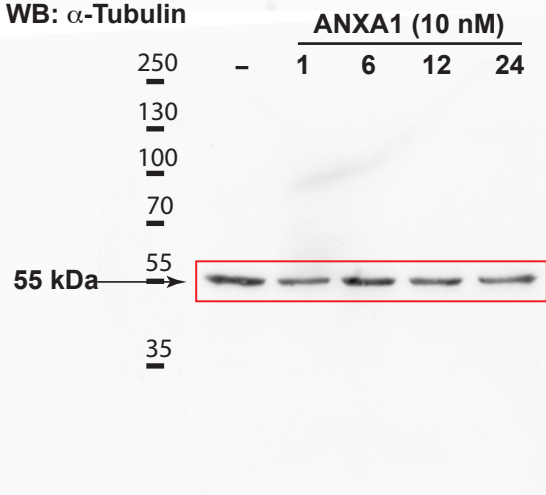

WB:  $\alpha$ -xCT/SLC7A11

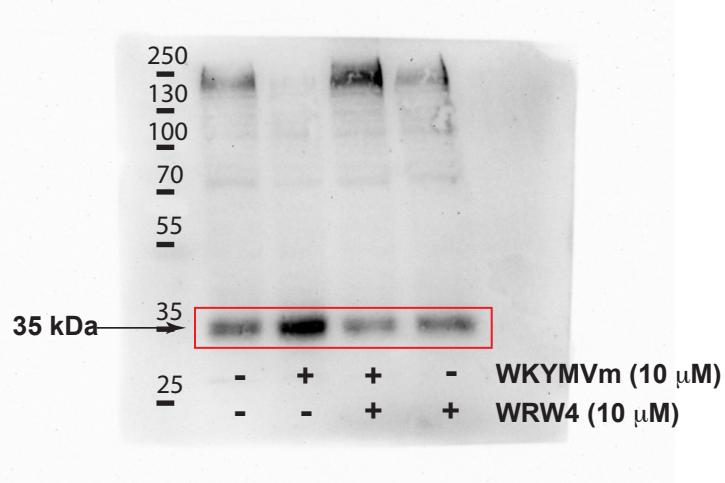

WB:  $\alpha$ -Tubulin

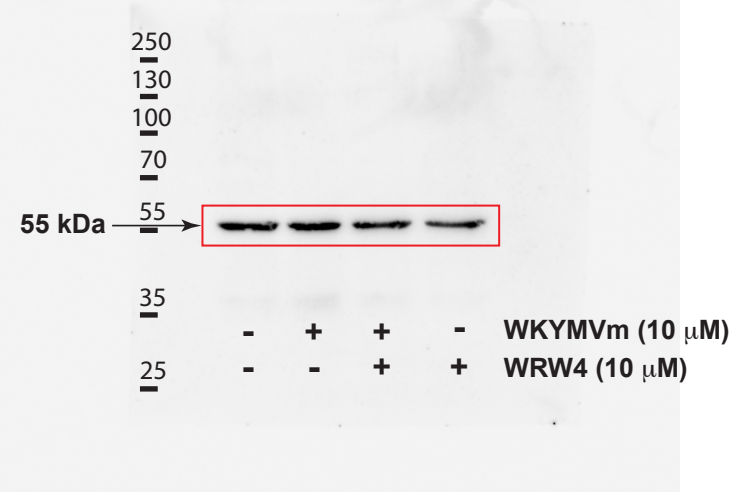

WB:  $\alpha$ -xCT/SLC7A11

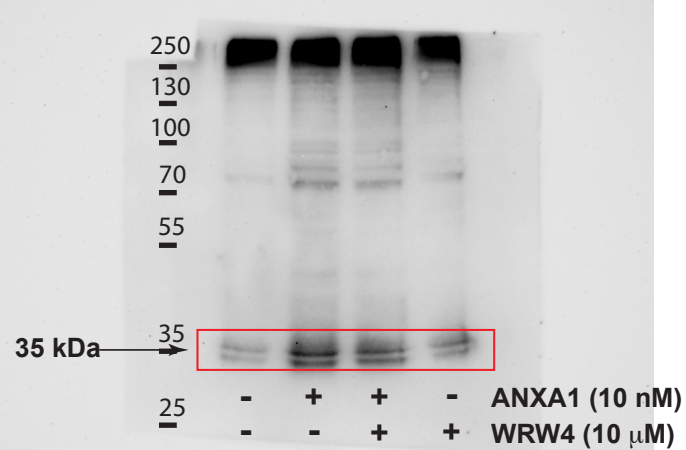

WB:  $\alpha$ -Tubulin

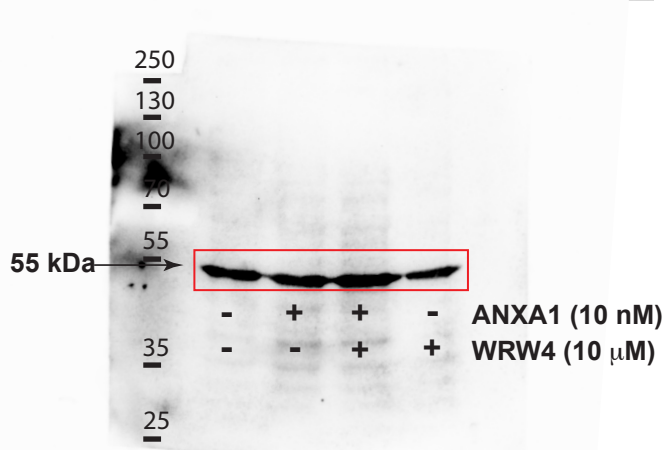

Supplement: s1 [file s1]
