# Supplementary material for: Formyl-Peptide Receptor 2 Signaling Modulates SLC7A11/xCT Expression and Activity in Tumor Cells
Source: MDPI journal article supplement (doi:10.3390/antiox13050552), 2024-04-30
Supplement: s1 [file s1]

Supplementary Figure S1

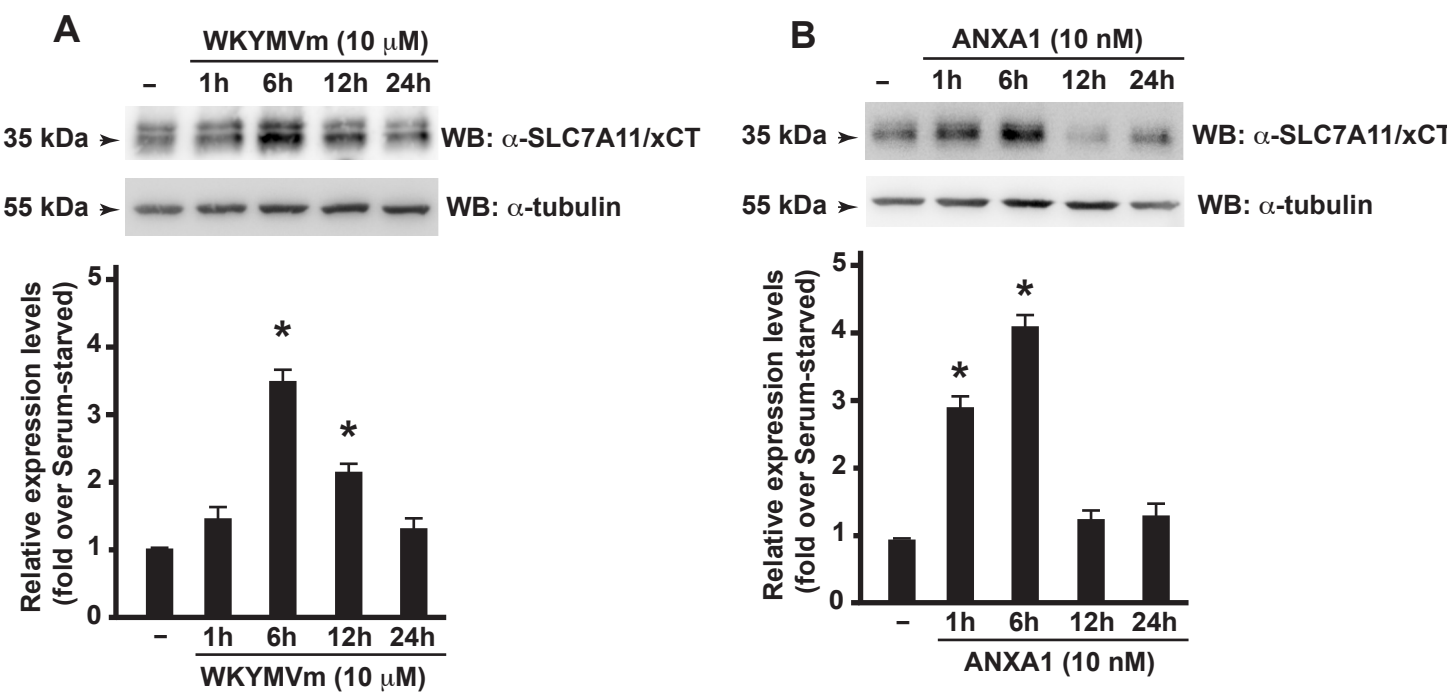

**Supplementary figure1.** HCT 116 cells were serum-starved for 24 hours and then stimulated for 1, 6, 12 or 24 hours with WKYMVm (A) or ANXA1 (B). Fifty-five micrograms of whole lysates were resolved on 10% SDS-PAGE and incubated with an anti-SLC7A11/xCT ( $\alpha$ -SLC7A11/xCT) antibody. An anti-tubulin ( $\alpha$ -tubulin) antibody was used as a control of protein loading. Data are representative of 3 different experiments. \* $p < 0.05$  compared to unstimulated cells.
