# Supplementary figures and images for: Formyl-Peptide Receptor 2 Signaling Modulates SLC7A11/xCT Expression and Activity in Tumor Cells
Source: MDPI journal article supplement (doi:10.3390/antiox13050552), 2024-04-30

Supplementary Figure S6

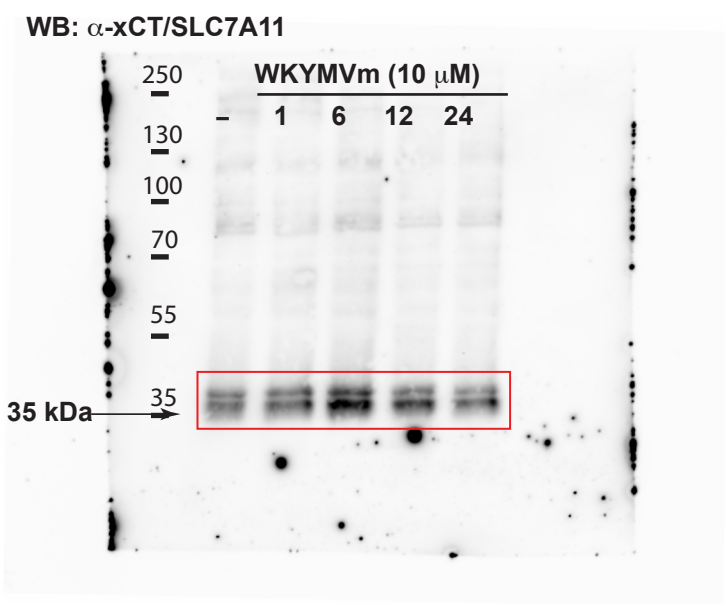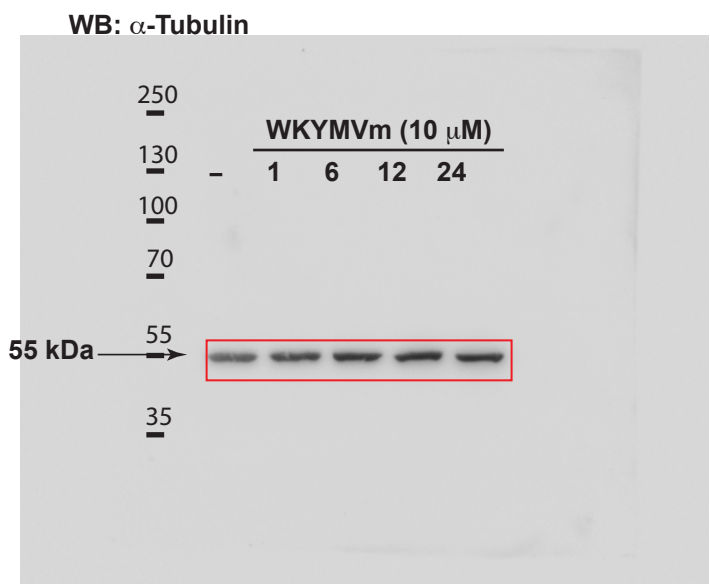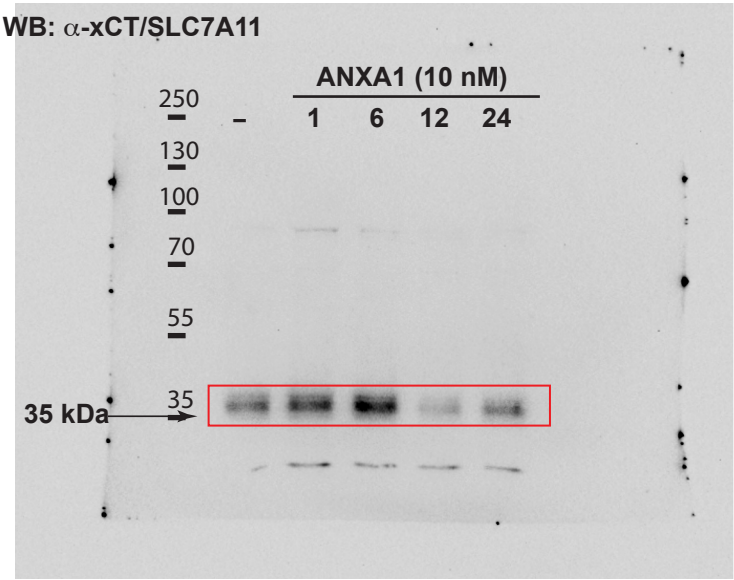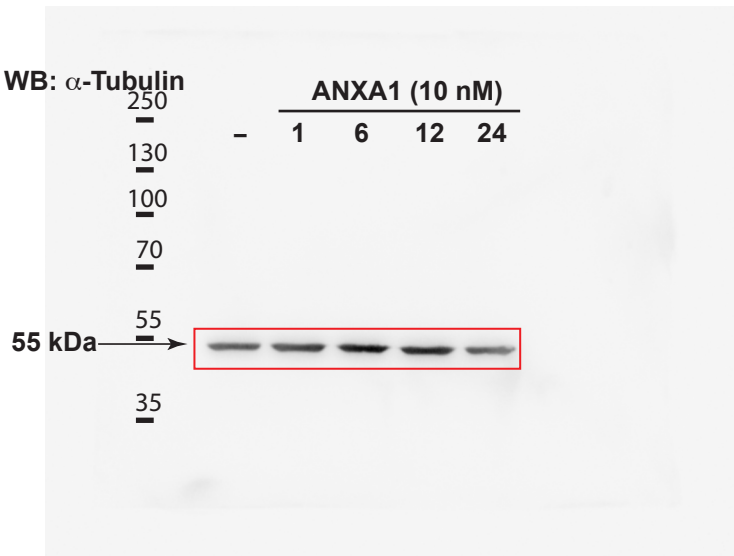

Supplement: s1 [file s1]

Supplementary Figure S5

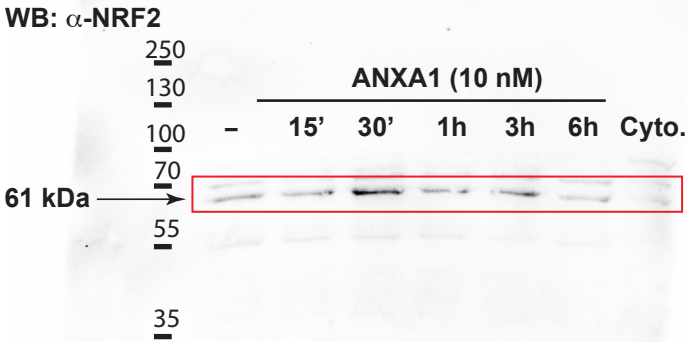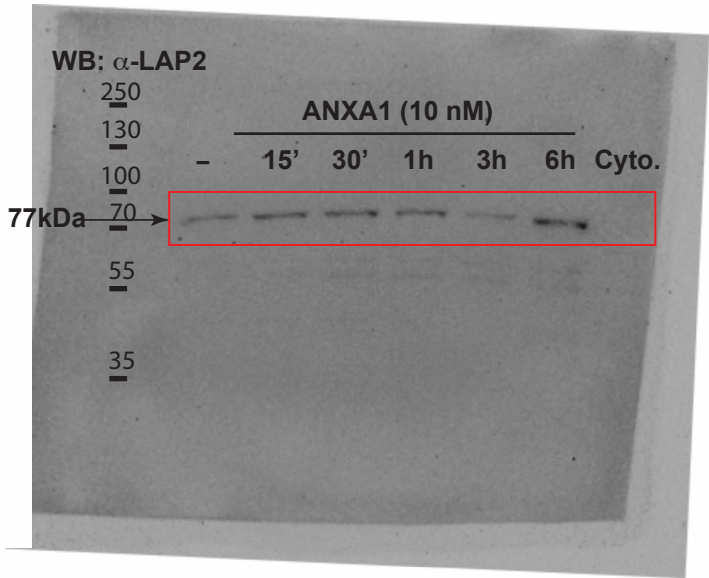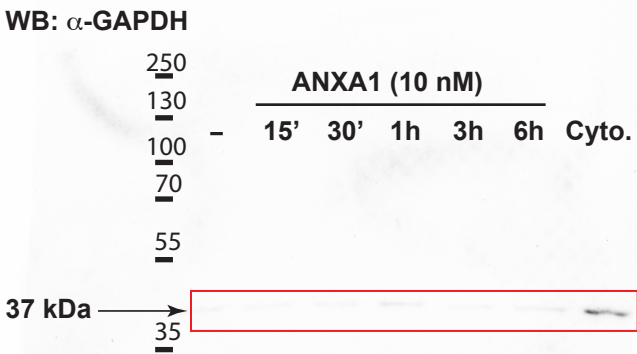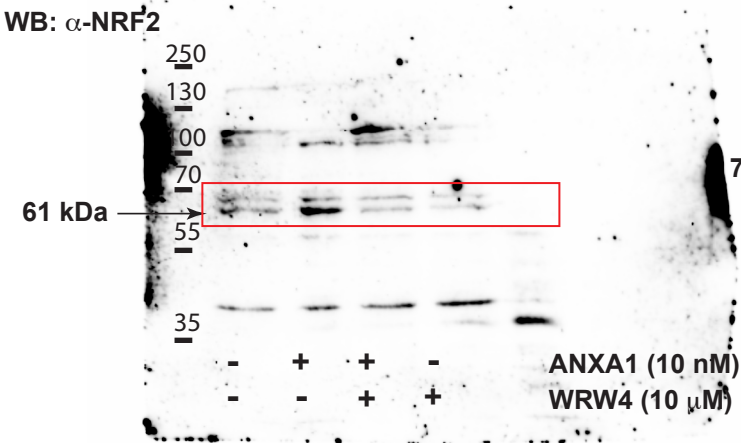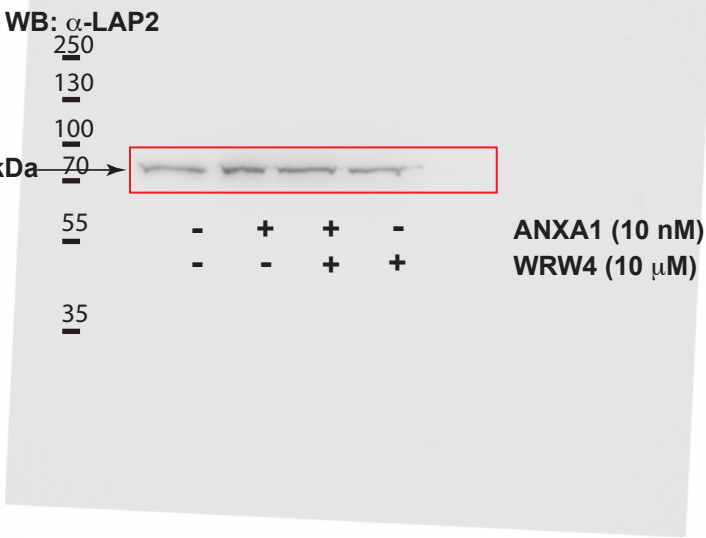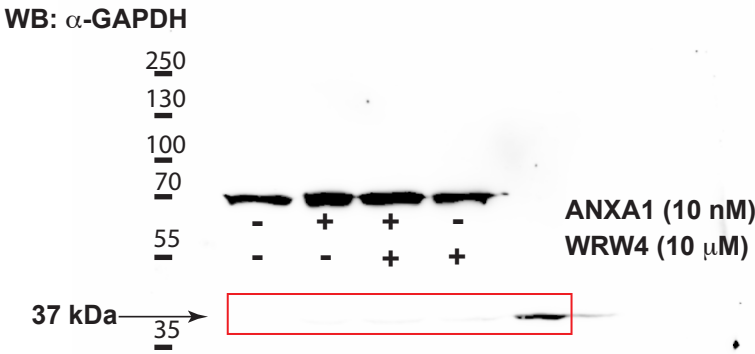

Supplement: s1 [file s1]
